# Supplementary material for: Mn(ii) complex impregnated porous silica nanoparticles as Zn(ii)-responsive “Smart” MRI contrast agent for pancreas imaging
Source: Royal Society of Chemistry journal article supplement (doi:10.1039/d3tb01289a), 2023-01-01
Supplement: d3tb01289a1.pdf [file d3tb01289a1.pdf]

## Supporting Information

### Mn(II) Complex Impregnated Porous Silica Nanoparticles as Zn(II)-Responsive “Smart” MRI Contrast Agent for Pancreas Imaging

Riya Mallik, Muktashree Saha, Vandna Singh, Hari Mohan, S. Senthil Kumaran, and Chandan Mukherjee\*

| Contents                                                                                                                                                                | Page    |
|-------------------------------------------------------------------------------------------------------------------------------------------------------------------------|---------|
| <sup>1</sup> H NMR, <sup>13</sup> C NMR spectra, ESI-MS (+ve) and FTIR plots for ligand H <sub>2</sub> AlcDPA                                                           | S2-S3   |
| FTIR plots for ligand Complex <b>1</b>                                                                                                                                  | S4      |
| <sup>1</sup> H NMR, <sup>13</sup> C NMR spectra, ESI-MS (+ve) and FTIR plots for ligand HPy <sub>2</sub> Pic                                                            | S5-S6   |
| Experimental and simulated curves representing pH-potentiometric titration of ligand H <sub>2</sub> AlcDPA and Hpy <sub>2</sub> Pic solution, in 0.15 M NaCl and 25 °C  | S7      |
| UV-Vis spectra of Complex <b>1</b> at pH ~ 7.4 and pH ~ 10.1, and 25 °C                                                                                                 | S8      |
| Morphological characterization of Complex <b>1</b> @SiO <sub>2</sub> -NH <sub>2</sub> NPs and Complex <b>1</b> @SiO <sub>2</sub> -Py <sub>2</sub> PicNPs                | S8-S9   |
| FTIR spectra for Complex <b>1</b> @SiO <sub>2</sub> -Py <sub>2</sub> PicNPs, lyophilized from water and D <sub>2</sub> O medium, in the presence of BSA and Zn(II) ions | S9-S10  |
| Relaxometric studies of different synthesized nanomaterials                                                                                                             | S10-S12 |
| TGA and zeta potential studies for BSA and Zinc ion interaction with Complex <b>1</b> @SiO <sub>2</sub> -Py <sub>2</sub> PicNPs                                         | S13     |
| Fluorescence quenching studies of BSA by Complex <b>1</b> @SiO <sub>2</sub> -Py <sub>2</sub> PicNPs and Zinc ions                                                       | S14     |
| Biodistribution of Mn in different organ tissues, post <i>in-vivo</i> administration of synthesized nanomaterials                                                       | S15     |
| Number of Complexes per Nanoparticle                                                                                                                                    | S15     |
| Fluorescence quenching study                                                                                                                                            | S16     |
| Selected bond distances (Å) and bond angles (°) for Complex <b>1</b>                                                                                                    | S16     |
| Ligand protonation constants and corresponding stability constants for some Mn(II) complexes                                                                            | S17     |
| Complex <b>1</b> @SiO <sub>2</sub> -Py <sub>2</sub> PicNPs•BSA•Zn(II) interaction studies                                                                               | S17     |
| Crystallographic data and structure refinement parameters for ligand H <sub>2</sub> PyDPA and Complex <b>1</b>                                                          | S18     |

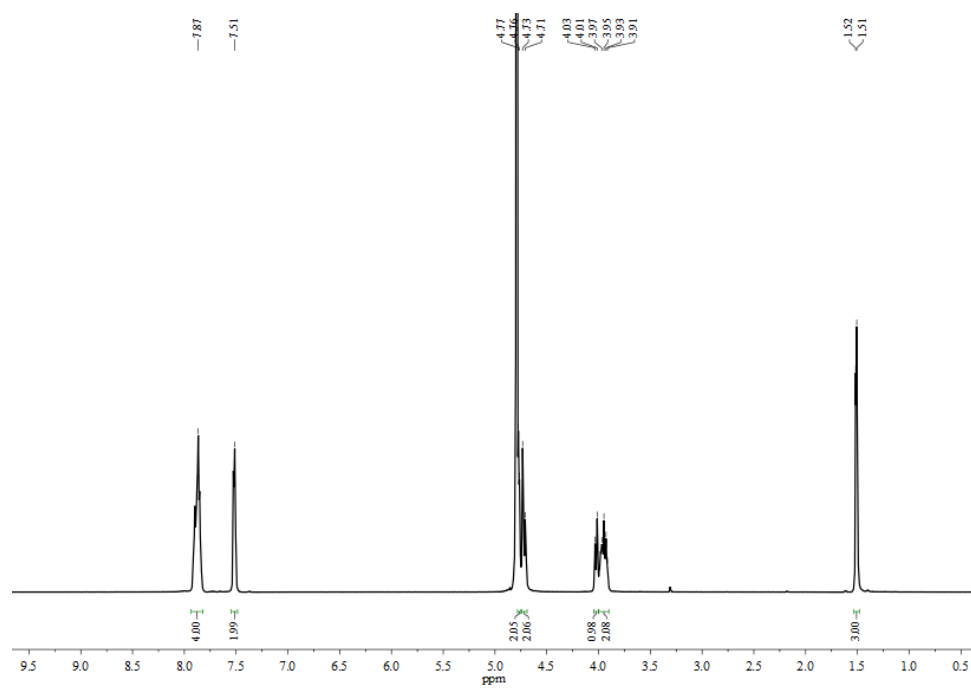

**Figure S1.**  $^1\text{H}$ -NMR spectrum of ligand  $\text{H}_2\text{AlcDPA}\cdot\text{HCl}$  in  $\text{D}_2\text{O}$  solvent.

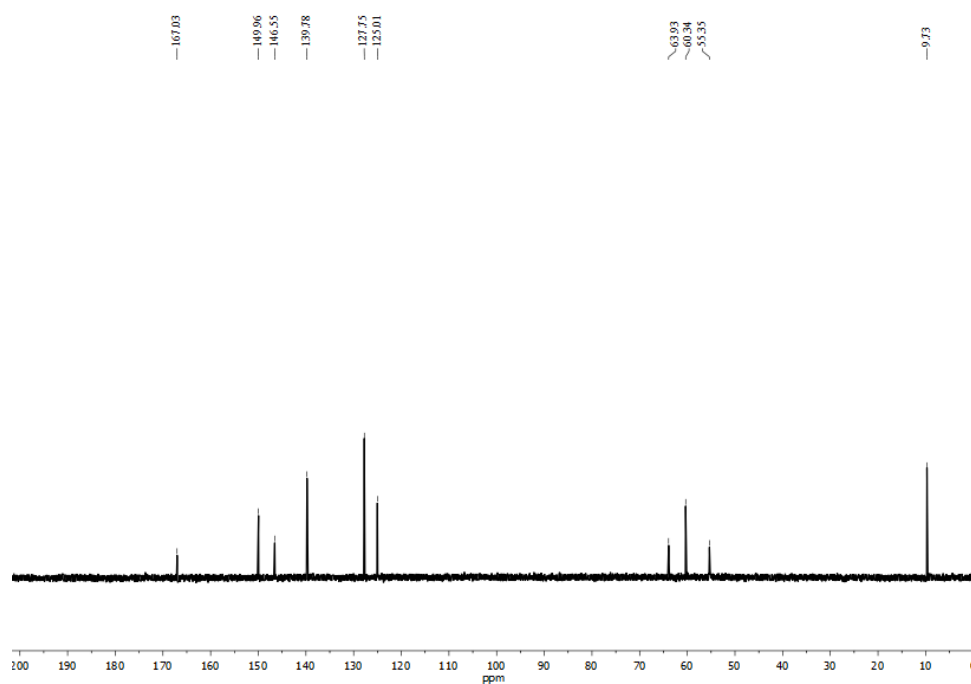

**Figure S2.**  $^{13}\text{C}$ -NMR spectrum of ligand  $\text{H}_2\text{AlcDPA}\cdot\text{HCl}$  in  $\text{D}_2\text{O}$  solvent.

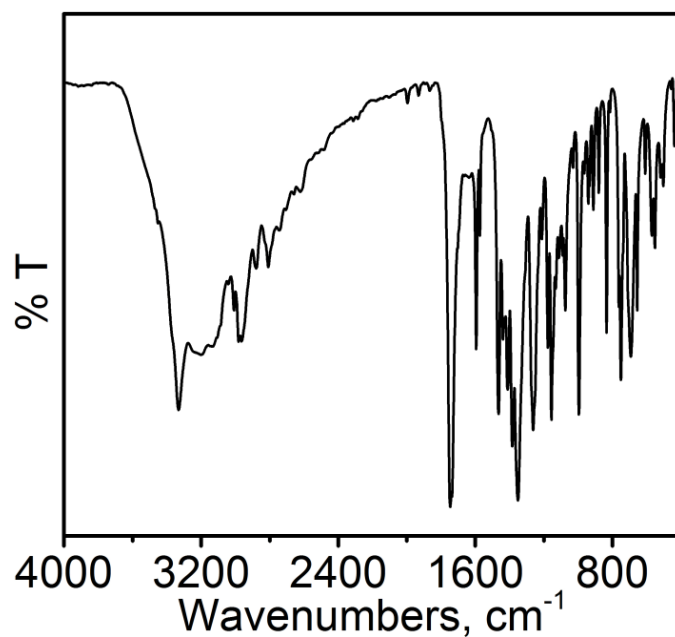

**Figure S3.** FTIR spectrum of ligand  $\text{H}_2\text{AlcDPA}\cdot\text{HCl}$ .

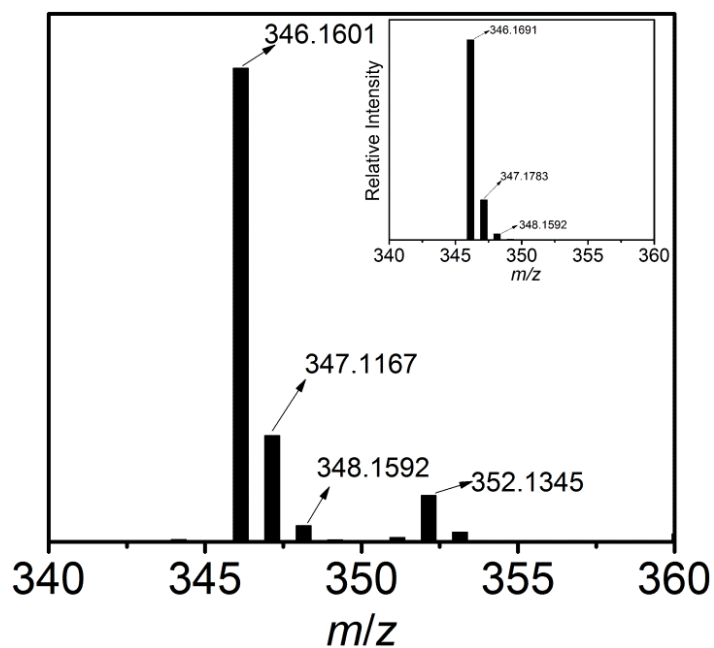

**Figure S4.** ESI-MS (+ve) mass spectrum of aqueous solution of ligand  $\text{H}_2\text{AlcDPA}\cdot\text{HCl}$ . Simulated spectrum has been given as inset.

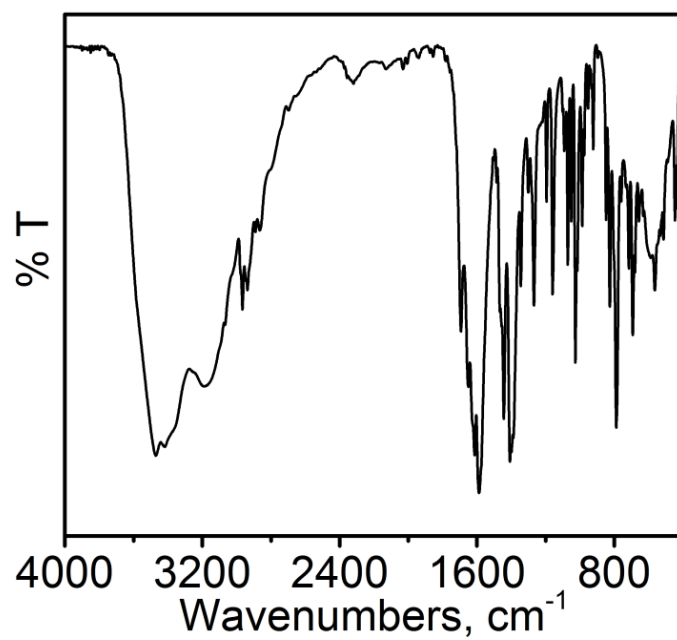

**Figure S5.** FTIR spectrum of Complex 1.

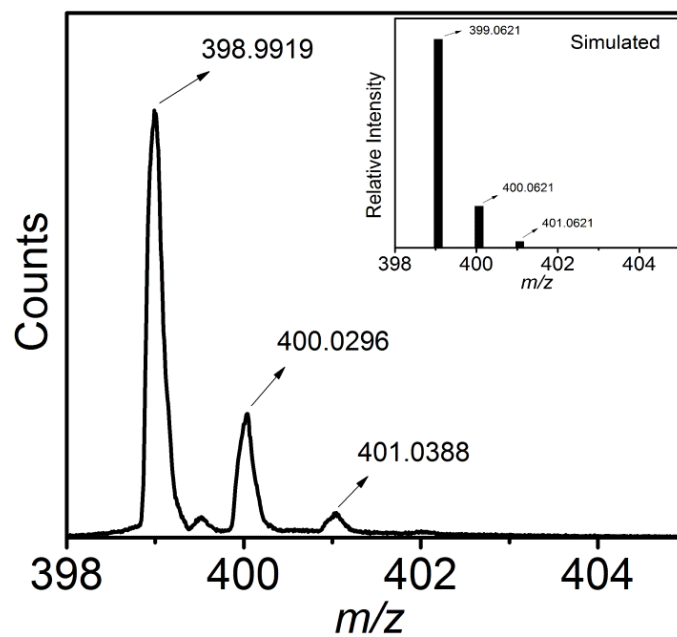

**Figure S6.** ESI-MS (+ve) mass spectrum of Complex 1. Simulated spectrum has been given as inset.

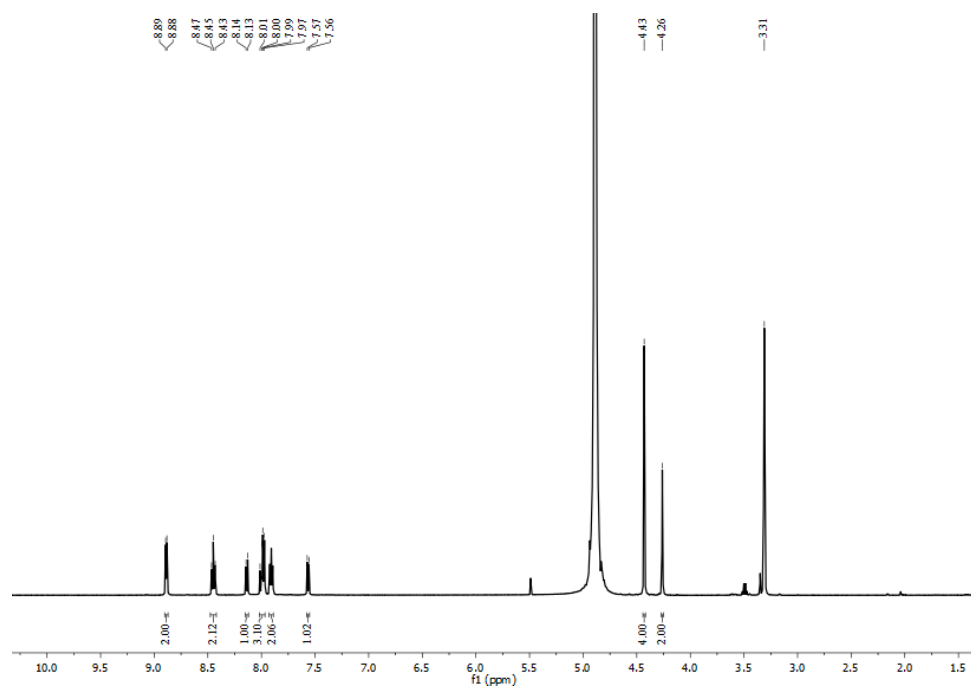

**Figure S7.**  $^1\text{H}$ -NMR spectrum of ligand  $\text{HPy}_2\text{Pic}\cdot\text{HPF}_6$  in  $\text{CD}_3\text{OD}$  solvent.

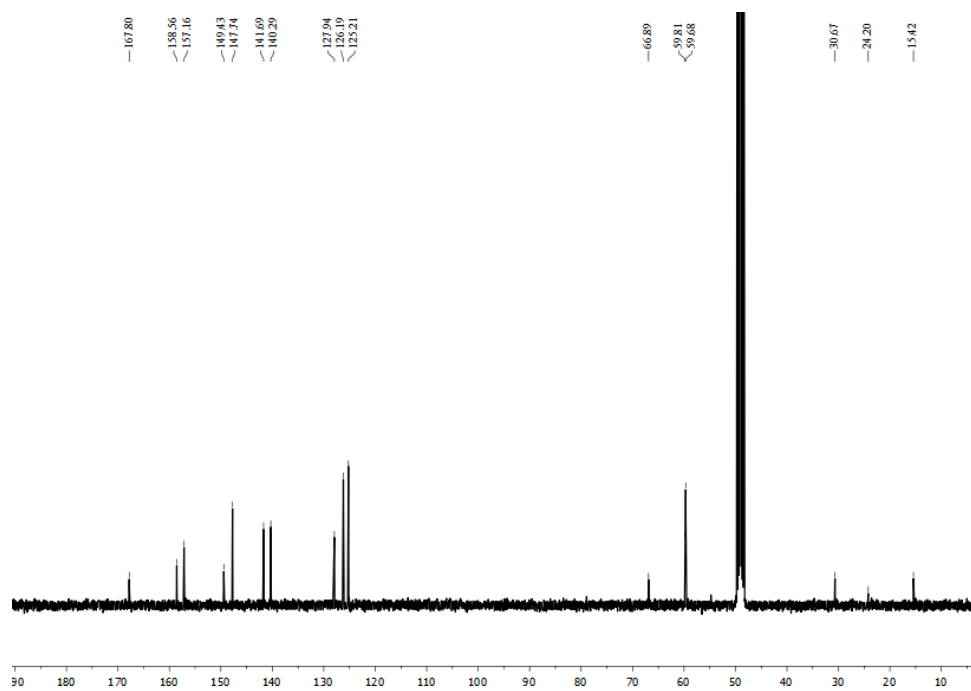

**Figure S8.**  $^{13}\text{C}$ -NMR spectrum of ligand  $\text{HPy}_2\text{Pic}\cdot\text{HPF}_6$  in  $\text{CD}_3\text{OD}$  solvent.

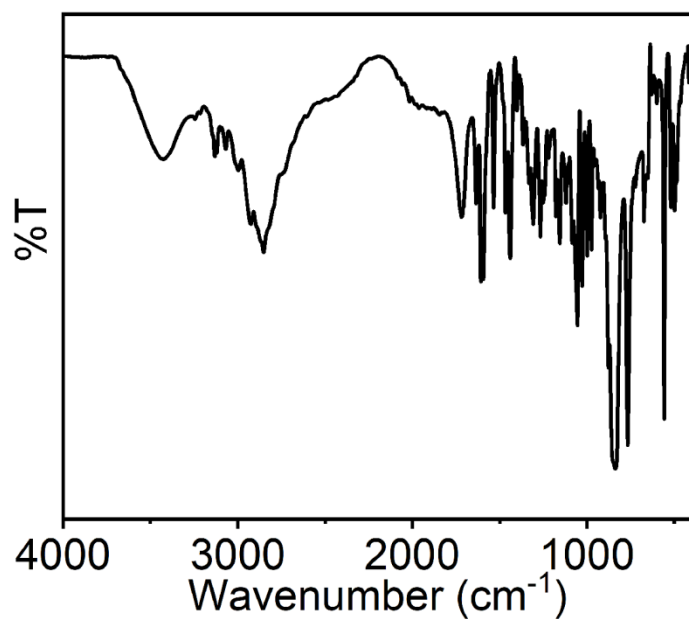

**Figure S9.** FTIR spectrum of ligand HPy<sub>2</sub>Pic•HPF<sub>6</sub>.

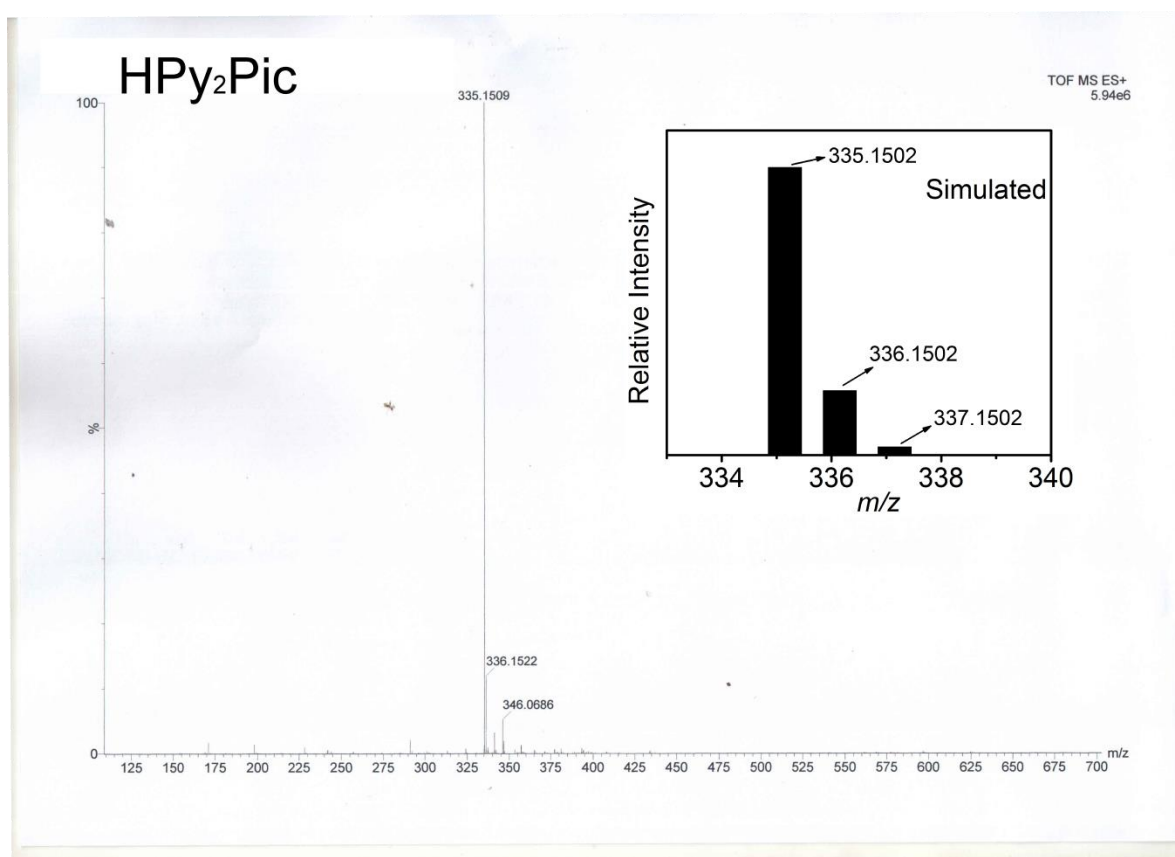

**Figure S10.** ESI-MS (+ve) mass spectrum of aqueous solution of ligand HPy<sub>2</sub>Pic•HPF<sub>6</sub>. Simulated spectrum has been given as inset.

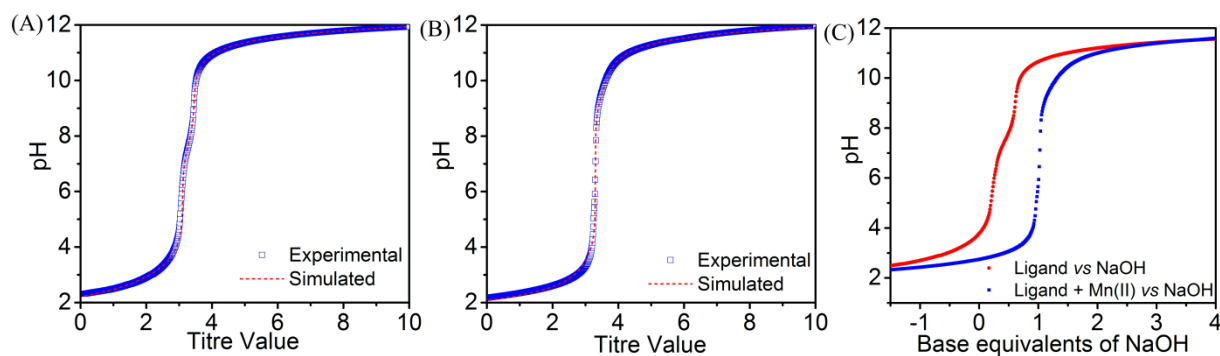

**Figure S11:** Experimental and simulated curves representing pH-potentiometric titration of (A) ligand  $\text{H}_2\text{AlcDPA}$  solution, and (B) ligand  $\text{H}_2\text{AlcDPA}:\text{Mn(II)}$  (1:1) solution against standard  $\text{NaOH}$  solution in 0.15 M  $\text{NaCl}$  and 25 °C. (C) Potentiometric titration curves of the ligand  $\text{H}_2\text{AlcDPA}$  solution with 1 equivalent of  $\text{MnCl}_2 \cdot 4\text{H}_2\text{O}$  salt in  $\text{H}_2\text{O}$  in 0.15 M  $\text{NaCl}$ , and 25 °C.

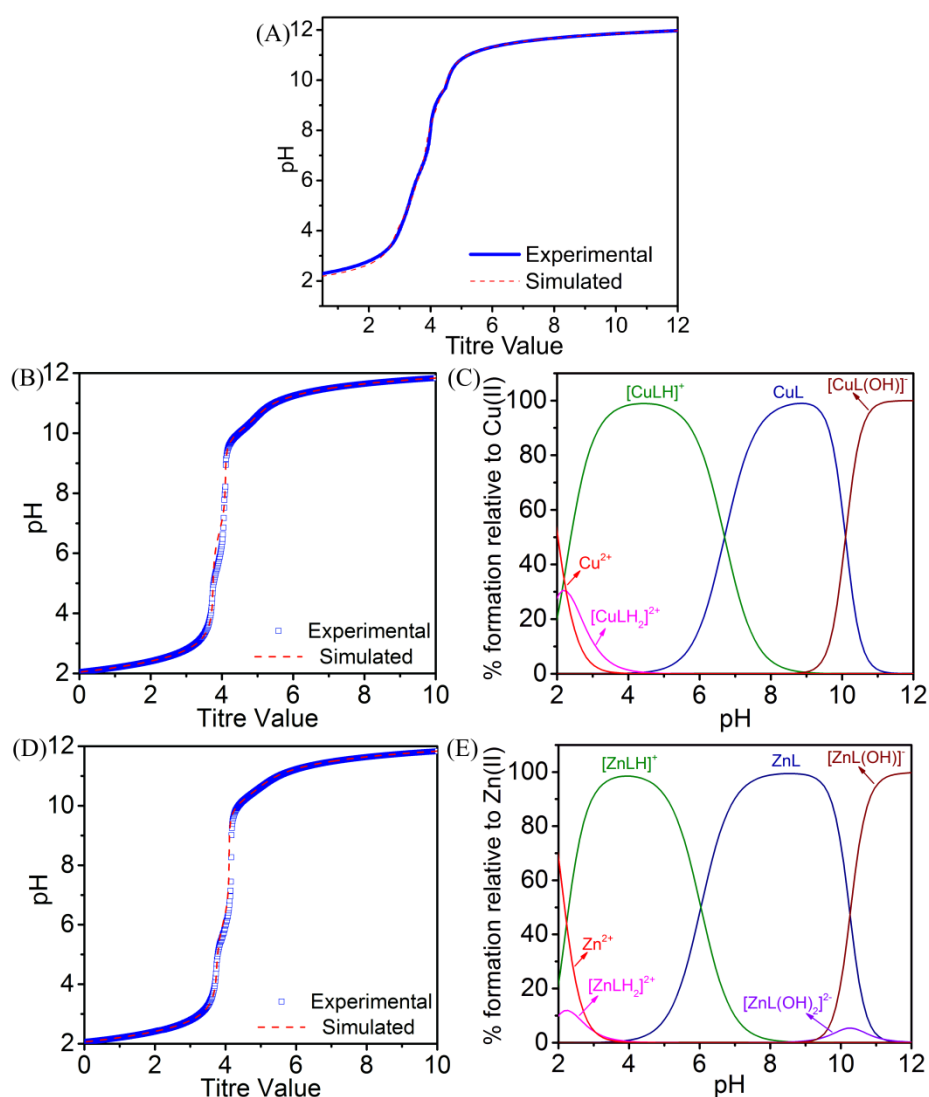

**Figure S12:** Experimental and simulated curves representing pH-potentiometric titration of (A) ligand  $\text{HPy}_2\text{Pic}$  solution, (B) ligand  $\text{HPy}_2\text{Pic}:\text{Cu(II)}$  (1:1) solution and (D) ligand  $\text{HPy}_2\text{Pic}:\text{Zn(II)}$  (1:1) solution against standard  $\text{NaOH}$  solution in 0.15 M  $\text{NaCl}$  and 25 °C. (C) and

(E) represented corresponding species distribution plots for HPy<sub>2</sub>Pic:Cu(II) and HPy<sub>2</sub>Pic:Zn(II) systems, respectively.

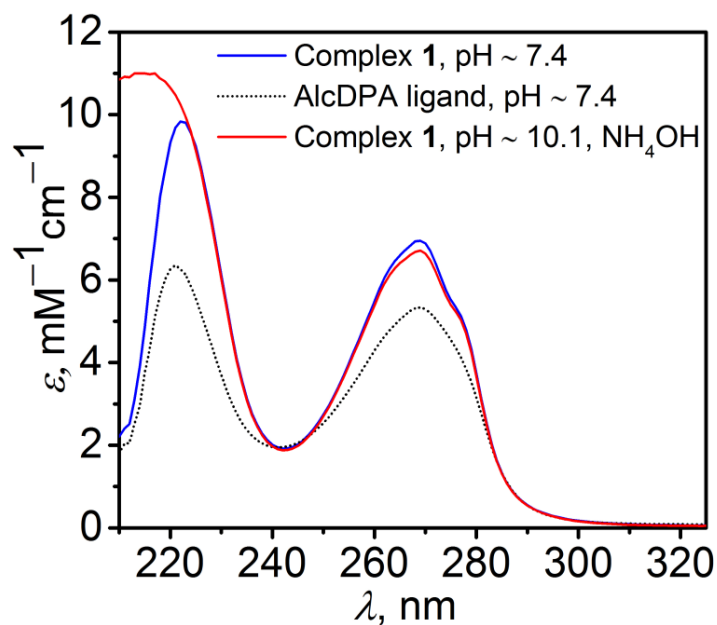

**Figure S13:** UV-Vis spectroscopy of Complex 1 at pH ~ 7.4 and pH ~ 10.1 (attained by addition of NH<sub>4</sub>OH), and 25 °C.

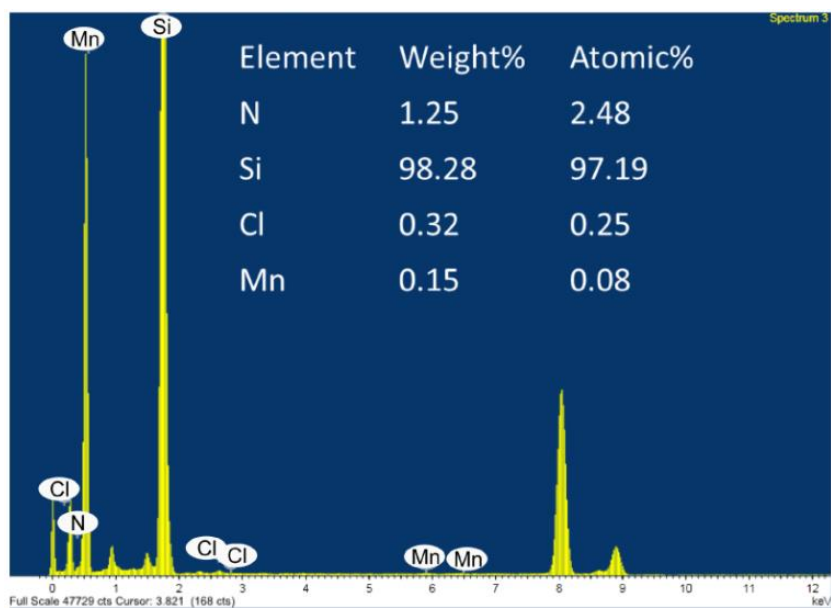

**Figure S14.** Morphological characterization of Complex 1@SiO<sub>2</sub>-NH<sub>2</sub>NPs: Energy dispersive X-ray (EDS) analysis of Complex 1@SiO<sub>2</sub>-NH<sub>2</sub>NPs showing existence of Mn, Si, N and Cl elements in the isolated nanoparticles.



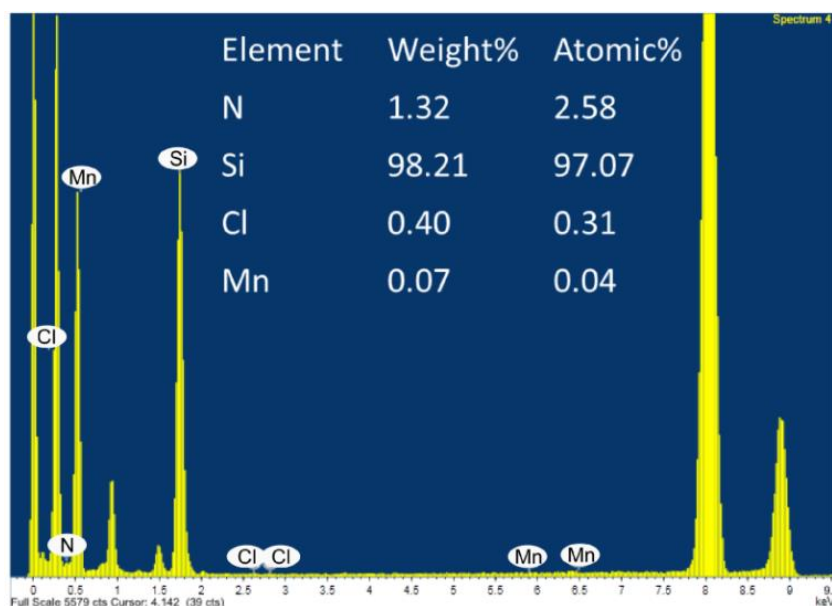

**Figure S15.** Morphological characterization of Complex 1@SiO<sub>2</sub>-Py<sub>2</sub>PicNPs: Energy dispersive X-ray (EDS) analysis of Complex 1@SiO<sub>2</sub>-Py<sub>2</sub>PicNPs showing existence of Mn, Si, N and Cl elements in the isolated nanoparticles.

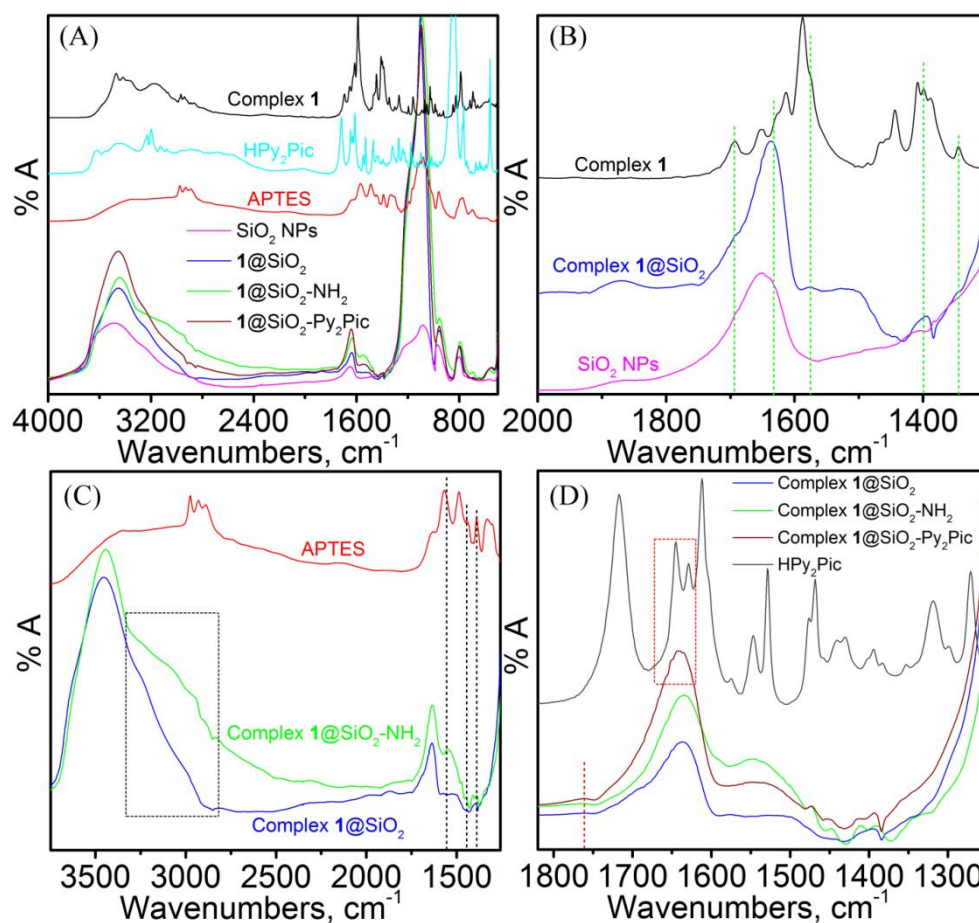

**Figure S16.** (A) FTIR spectra of Complex 1@SiO<sub>2</sub>NP, Complex 1@SiO<sub>2</sub>-NH<sub>2</sub>NP, and Complex 1@SiO<sub>2</sub>-Py<sub>2</sub>PicNP compared to the spectra for pristine SiO<sub>2</sub> NPs, Complex 1, HPy<sub>2</sub>Pic and APTES. (B)-(D) Zoomed in regions.

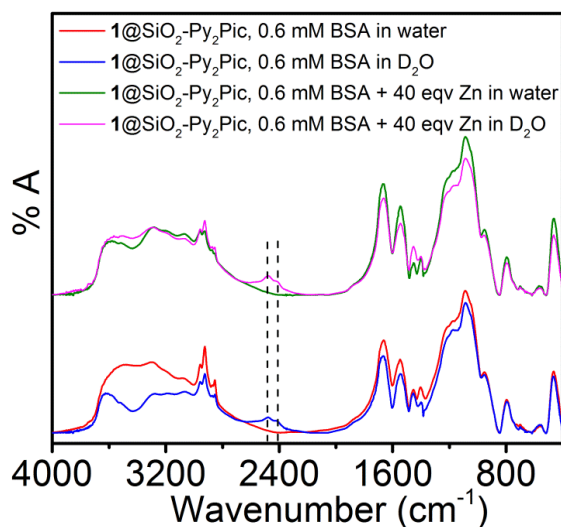

**Figure S17.** FTIR spectra of lyophilized Complex **1**@SiO<sub>2</sub>-Py<sub>2</sub>PicNP, recovered after suspending in 0.6 mM BSA solution in water (red line), in 0.6 mM BSA solution in D<sub>2</sub>O (blue line), in 0.6 mM BSA and 40 eqv. Zn(II) solution in water (green line), and in 0.6 mM BSA and 40 eqv. Zn(II) solution in D<sub>2</sub>O (pink line).

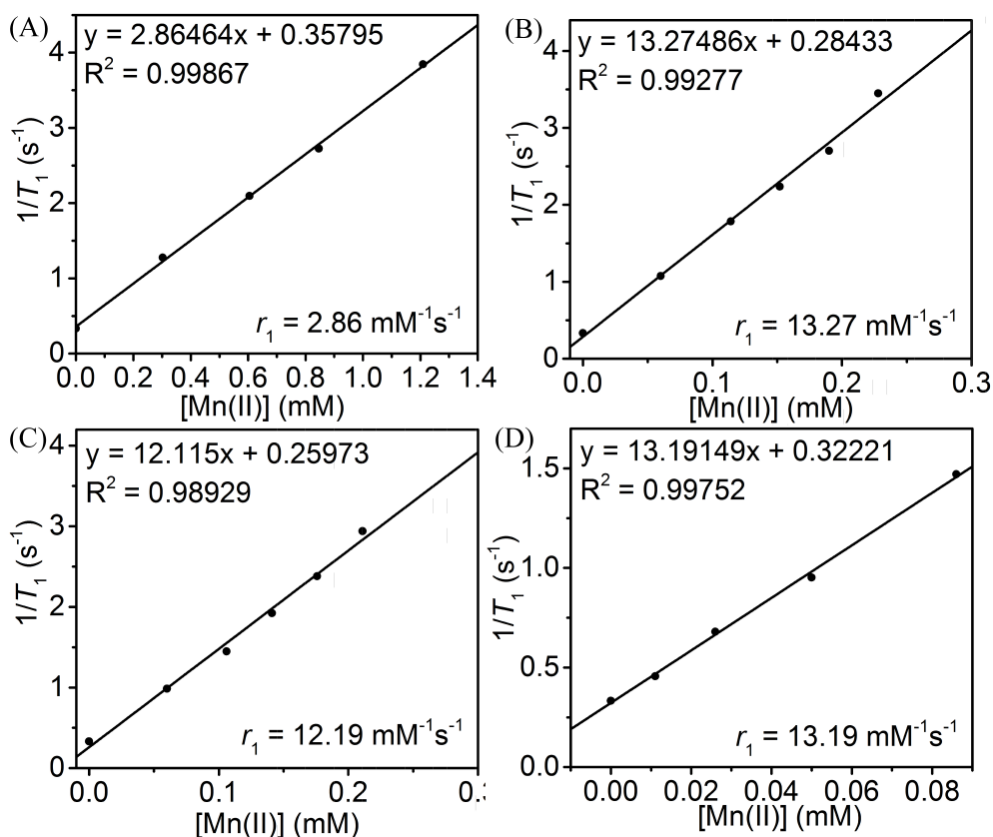

**Figure S18:**  $1/T_1$  vs  $[Mn(II)]$  plot for (A) Complex **1**, (B) Complex **1**@SiO<sub>2</sub>, (C) Complex **1**@SiO<sub>2</sub>-NH<sub>2</sub>NP, and (D) Complex **1**@SiO<sub>2</sub>-Py<sub>2</sub>PicNP. Experiments were done at 1.41 T, 37 °C, and pH ~ 7.4.

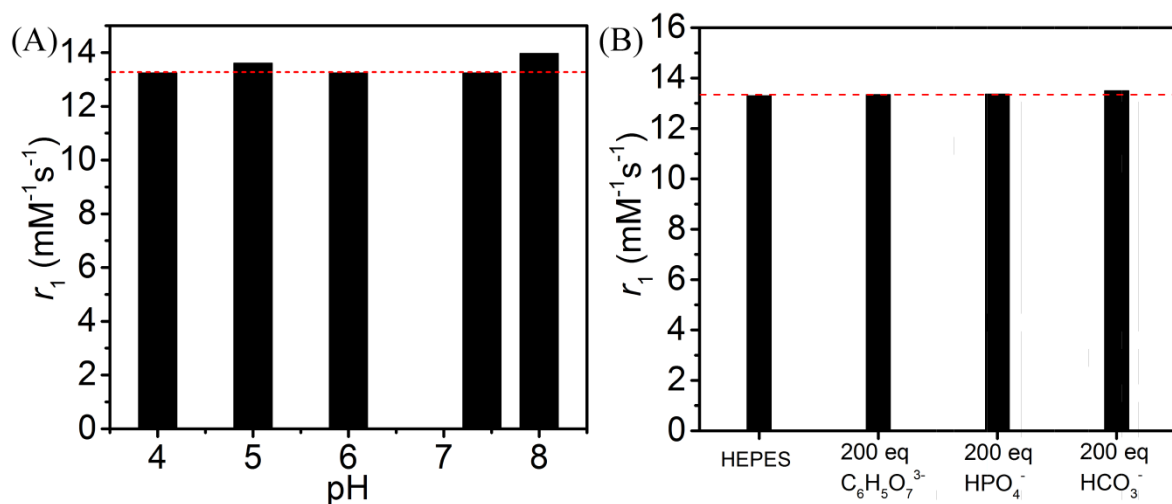

**Figure S19:**  $r_1$  values for Complex 1@SiO<sub>2</sub>-Py<sub>2</sub>PicNP suspension, (A) in the pH range 4.0-8.0, and (B) in the presence of 200 equivalents excess of different physiologically relevant anions, at pH 7.4; [Mn(II)] = 0.1 mM.

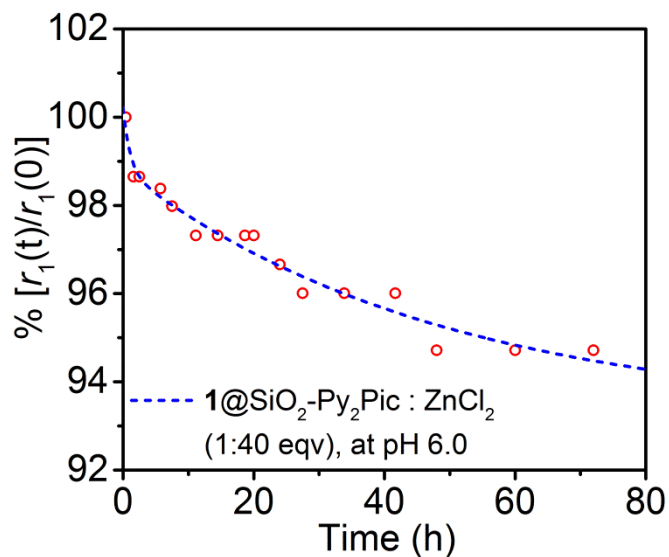

**Figure S20.** Time dependent longitudinal relaxivity study of Complex 1@SiO<sub>2</sub>-Py<sub>2</sub>PicNP suspension challenged with 40 equivalents excess of Zn(II) ion. Experiment was performed with sample containing [Mn(II)] = 0.1 mM, dispersed in MES buffer, pH ~ 6.0, 1.41 T, at 37 °C.

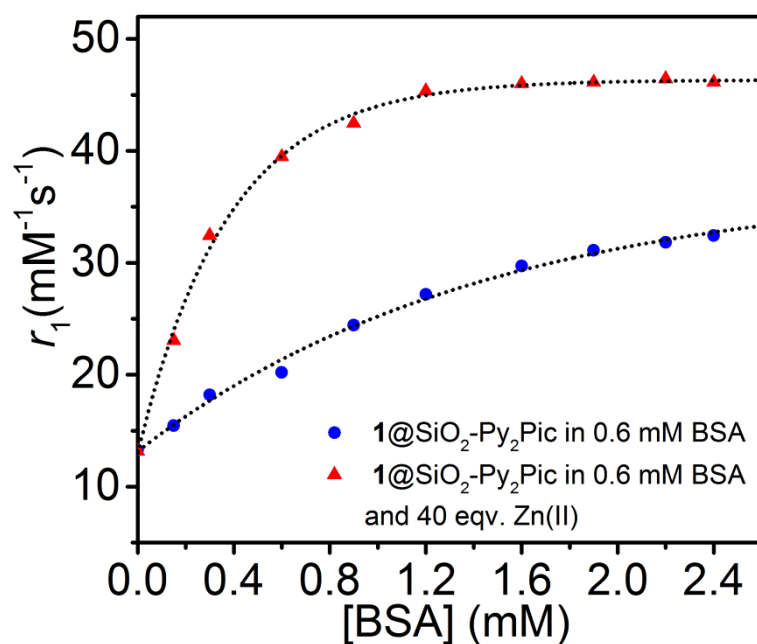

**Figure S21.** Relaxometric titrations of Complex  $1@SiO_2-Py_2PicNP$  (0.06 mM Mn(II) concentration) as a function of increasing concentration of BSA, in the absence and presence of 40 equiv. excess of Zn(II) ions. Measurements were done at pH  $\sim$  7.4, 1.41 T, and 37 °C.

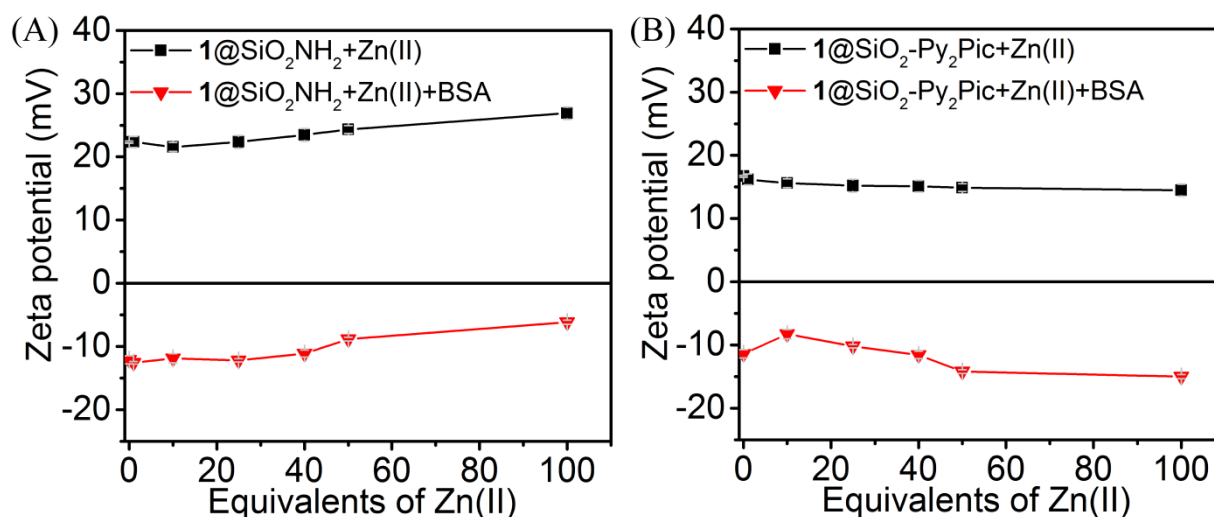

**Figure S22.** Zeta potential changes of (A) Complex  $1@SiO_2-NH_2NP$  and (B) Complex  $1@SiO_2-Py_2PicNP$  with increasing equivalents of Zn(II), in the absence and presence of 0.6 mM BSA, at pH  $\sim$  7.4.

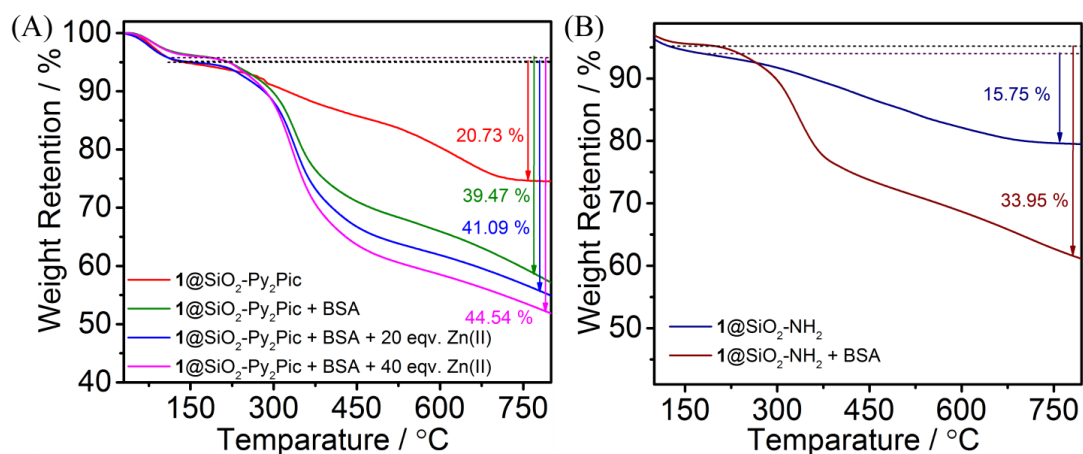

**Figure S23:** TGA analysis spectra for (A) Complex **1**@SiO<sub>2</sub>-Py<sub>2</sub>PicNP lyophilized solid obtained after isolating Complex **1**@SiO<sub>2</sub>-Py<sub>2</sub>PicNP from (i) water (red line), (ii) 0.6 mM BSA solution (green line), (iii) 0.6 mM BSA and 20 equiv. Zn(II) solution (blue line), and (iv) 0.6 mM BSA and 40 equiv. Zn(II) solution (pink line); (B) Complex **1**@SiO<sub>2</sub>-NH<sub>2</sub>NP lyophilized solid obtained after isolating Complex **1**@SiO<sub>2</sub>-NH<sub>2</sub>NP from (i) water (navy line) and (ii) 0.6 mM BSA (brown line).

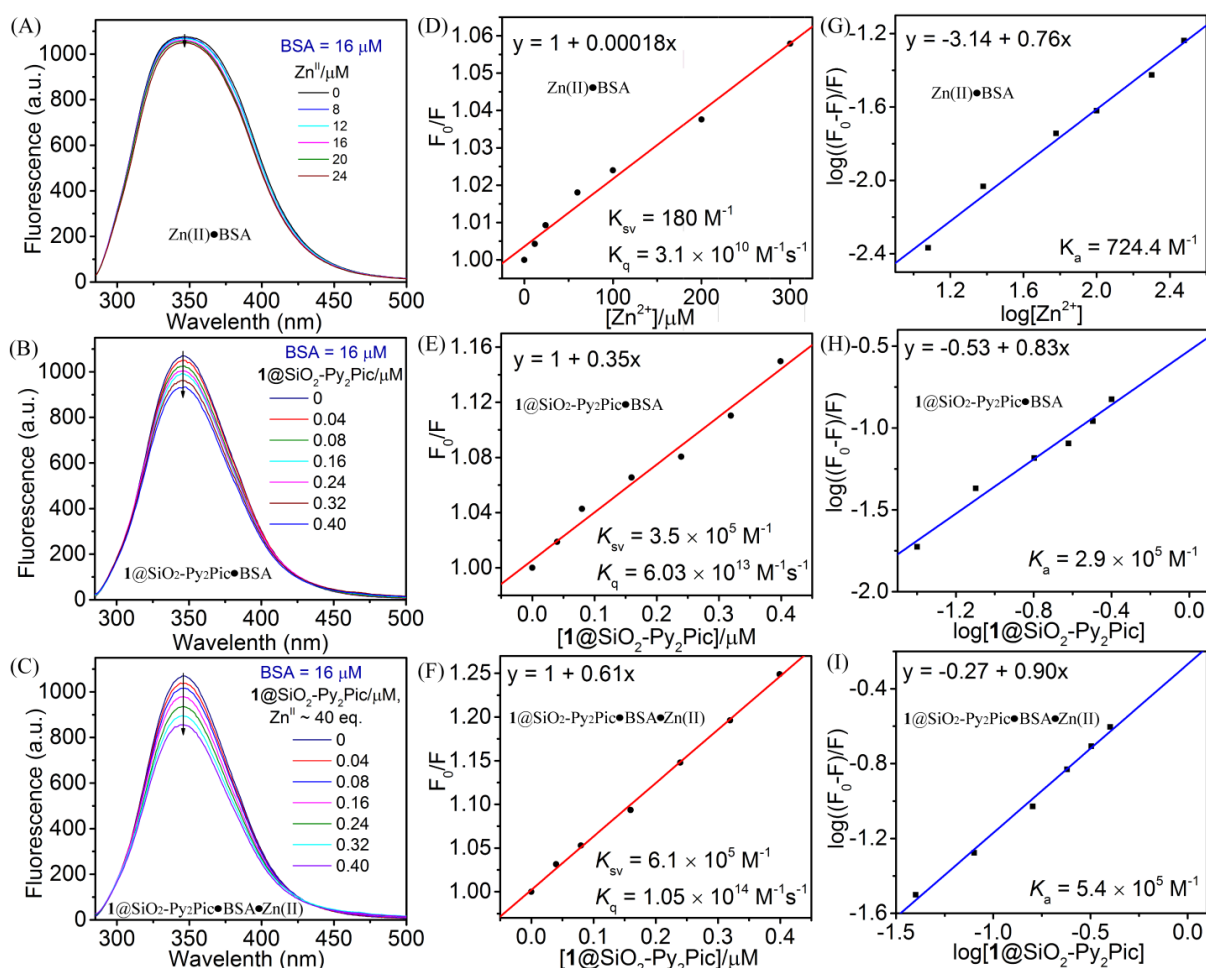

**Figure S24.** Estimation of Zn(II)•BSA, 1@SiO<sub>2</sub>-Py<sub>2</sub>Pic•BSA and 1@SiO<sub>2</sub>-Py<sub>2</sub>Pic:BSA•Zn(II) interactions by fluorescence spectroscopy. Fluorescence spectra of 16 μM BSA in the presence of increasing concentration of (A) Zn(II) ions, (B) 1@SiO<sub>2</sub>-Py<sub>2</sub>PicNPs, and (C) Zn(II) ions and 1@SiO<sub>2</sub>-Py<sub>2</sub>PicNPs together. Respective Stern-Volmer constant plots (D)-(F); and log (F<sub>0</sub>-F)/F plots (G)-(I) to find out corresponding quenching constants ( $K_q$ ) and affinity constants ( $K_a$ ). Binding sites ( $n$ ) was found to be equal to 1 in each case.

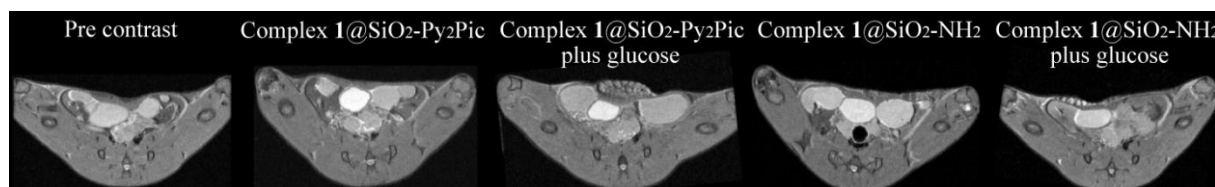

**Figure S25.** T<sub>1</sub>-weighted axial images of mice showing contrast changes in urinary bladder pre and 1 hour post administration of Complex 1@SiO<sub>2</sub>-NH<sub>2</sub> or Complex 1@SiO<sub>2</sub>-Py<sub>2</sub>Pic, without or with D-glucose (injected 45 min after contrast administration), at 7 T animal MR scanner.

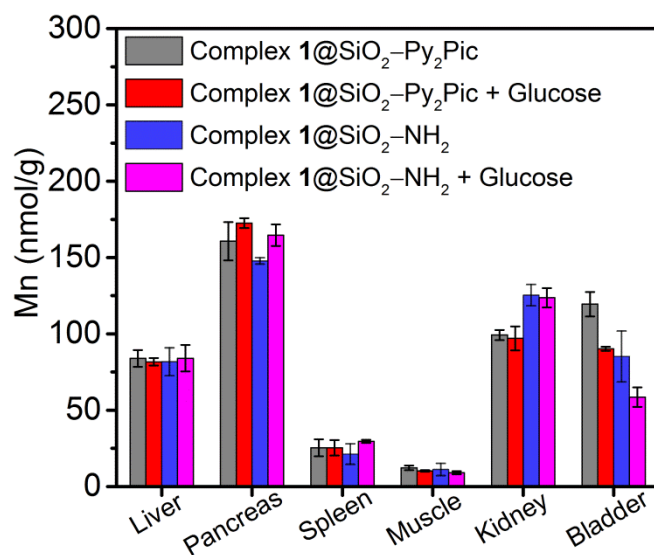

**Figure S26.** Manganese content in mice organ tissues, obtained by ICP-MS studies, 1 hour after intraperitoneal administration of respective contrast agents (10  $\mu\text{mol/kg}$  *w.r.t.* [Mn(II)]) along without or with glucose (2.2 mmol/kg).

#### Number of Complexes per Nanoparticle.

The average number of complexes confined within each nanoparticle (Complex 1@SiO<sub>2</sub>NP) was determined using the formula:<sup>[1]</sup>

$$N_1 = \frac{cVN_A}{\eta/m_{NP}} = \frac{cVN_A(\frac{1}{6}\pi\rho_{NP}d^3)}{\eta} \quad \text{(Equation S1)}$$

Where  $c$  = concentration in mother suspension,

$V$  = volume of mother suspension,

$N_A$  = Avogadro's number,

$\eta$  = yield from synthesis,

$m_{NP}$  = mass of nanoparticle,

$\rho_{NP}$  = density of nanoparticle (considered same as that of pure silica, 1.95 g cm<sup>-3</sup>),

$d$  = diameter of nanoparticle.

500  $\mu\text{L}$  of mother suspension was lyophilized for 24 h and 12 mg of dry silica were obtained.

For Mn(II) concentration to be 0.29 mM and each nanoparticle sized 13.22 nm,  $n_{\text{cplx}} = 34$ .

## Fluorescence quenching study.

Stern-Volmer equation:

$$F_0/F = 1 + K_{sv}[Q] = 1 + k_q \tau_0 [Q] \quad (\text{Equation S2})$$

$F_0$  and  $F$  are the maximum fluorescence intensities in the absence and presence of quencher, respectively.  $k_q$  is the bimolecular quenching constant, which is a measurement of the efficiency of quenching.  $\tau_0$  is the average lifetime of the Trp 214 unit and it is equal to  $5.8 \times 10^{-9}$  s.<sup>[2]</sup>  $[Q]$  is the quencher concentration.

$$\log[(F_0 - F)/F] = \log K_a + n \log [Q] \quad (\text{Equation S3})$$

$n$  is the number of binding sites and  $K_a$  represents the binding constant.

**Table S1:** Selected bond distances (Å) and bond angles (°) for complex **1**.

|            |           |
|------------|-----------|
| Mn1–O2     | 2.256(2)  |
| Mn1–O3     | 2.280(2)  |
| Mn1–O4     | 2.261(2)  |
| Mn1–N1     | 2.276(2)  |
| Mn1–N2     | 2.539(2)  |
| Mn1–N3     | 2.251(2)  |
| Mn1–Cl1    | 2.485(1)  |
| O2–Mn1–O4  | 77.63(6)  |
| O2–Mn1–N1  | 70.80(6)  |
| N3–Mn1–O4  | 72.02(6)  |
| N1–Mn1–N2  | 69.16(6)  |
| N3–Mn1–N2  | 68.46(6)  |
| O3–Mn1–Cl1 | 177.90(5) |



**Table S2:** Ligand protonation constants and corresponding stability constants for Mn(II), Zn(II) and Cu(II) complexes.

|                        |                                | PyC3A <sup>a</sup> | PC2A-DPA <sup>b</sup> | AlcDPA <sup>c</sup> | Py <sub>2</sub> Pic <sup>c</sup> |
|------------------------|--------------------------------|--------------------|-----------------------|---------------------|----------------------------------|
| <b>H<sup>+</sup></b>   | logK <sub>1</sub> <sup>H</sup> | 10.16              | 10.65                 | 7.69(3)             | 9.52(7)                          |
|                        | logK <sub>2</sub> <sup>H</sup> | 6.39               | 6.55                  | 3.75(2)             | 8.31(8)                          |
|                        | logK <sub>3</sub> <sup>H</sup> | 3.13               | 5.84                  | —                   | 6.34(8)                          |
|                        | logK <sub>4</sub> <sup>H</sup> | —                  | 4.39                  | —                   | 4.95(8)                          |
|                        | ΣlogK <sup>H</sup>             | 19.68              | 16.49                 | 11.45               | 29.12                            |
| <b>Mn<sup>2+</sup></b> | logK <sub>MnL</sub>            | 14.14              | 15.87                 | 15.06(8)            | —                                |
|                        | logK <sub>MnHL</sub>           | 2.43               | 4.14                  | 3.53(10)            | —                                |
|                        | pMn                            | 8.17               | 8.79                  | 9.56                | —                                |
| <b>Cu<sup>2+</sup></b> | logK <sub>CuL</sub>            | —                  | 19.05                 | —                   | 19.31(1)                         |
|                        | logK <sub>CuHL</sub>           | —                  | 3.63                  | —                   | 6.70(1)                          |
|                        | logK <sub>CuH2L</sub>          | —                  | —                     | —                   | 2.14(3)                          |
|                        | pCu                            | —                  | —                     | —                   | 10.59                            |
| <b>Zn<sup>2+</sup></b> | logK <sub>ZnL</sub>            | —                  | —                     | —                   | 19.76(1)                         |
|                        | logK <sub>ZnHL</sub>           | —                  | —                     | —                   | 6.03(8)                          |
|                        | logK <sub>ZnH2L</sub>          | —                  | —                     | —                   | 1.66(7)                          |
|                        | pZn                            | —                  | —                     | —                   | 10.82                            |

<sup>a</sup>[3] (I= 0.15 M NaCl, 25 °C). <sup>b</sup>[4] (I= 0.15 M NaCl, 25 °C). <sup>c</sup>This work (I= 0.15 M NaCl, 25 °C).

**Table S3.** Evaluation of interaction between Complex **1**@SiO<sub>2</sub>-Py<sub>2</sub>Pic and BSA, in the absence and presence of 40 equiv. excess Zn(II) ions by relaxometry, zeta potential, TGA, and fluorescence quenching studies.

| Suspension medium                               | <sup>(a)</sup> r <sub>1</sub> (mM <sup>-1</sup> s <sup>-1</sup> ) | ζ (mV) | TGA weight loss (%) | <sup>(b)</sup> r <sub>1</sub> <sup>sat</sup> (mM <sup>-1</sup> s <sup>-1</sup> ) | <sup>(c)</sup> K <sub>sv</sub> (10 <sup>5</sup> M <sup>-1</sup> ) | <sup>(c)</sup> K <sub>q</sub> (10 <sup>13</sup> M <sup>-1</sup> s <sup>-1</sup> ) | <sup>(c)</sup> K <sub>a</sub> (10 <sup>5</sup> M <sup>-1</sup> ) |
|-------------------------------------------------|-------------------------------------------------------------------|--------|---------------------|----------------------------------------------------------------------------------|-------------------------------------------------------------------|-----------------------------------------------------------------------------------|------------------------------------------------------------------|
| Water                                           | 13.19                                                             | 16.6   | 20.73               | —                                                                                | —                                                                 | —                                                                                 | —                                                                |
| BSA, 0.6 mM                                     | 20.18                                                             | -11.5  | 39.47               | 37.08                                                                            | 3.5                                                               | 6.0                                                                               | 2.9                                                              |
| BSA, 0.6 mM and 40 equiv. Zn <sup>II</sup> ions | 39.01                                                             | -11.6  | 44.54               | 46.55                                                                            | 6.1                                                               | 10.5                                                                              | 5.4                                                              |

Relaxometric studies were done at pH 7.4, 1.41 T, and 37 °C. <sup>(a)</sup> Each relaxivity value was obtained from 1/T<sub>1</sub> versus [Mn(II)] ([Mn(II)] = 0.02, 0.04, 0.08, 0.10 mM) plots with samples suspended in different medium, as mentioned. [Zn(II)] maintained at 40 equivalent excess amount, *w.r.t.* Mn(II) concentration. <sup>(b)</sup>Saturated relaxivity values obtained after fitting the titration curves of complex **1**@SiO<sub>2</sub>-Py<sub>2</sub>PicNP (0.06 mM Mn(II) concentration) with increasing concentration of BSA, in absence and presence of 40 equiv. excess of Zn(II) ions. <sup>(c)</sup>Binding sites (n) was found to be equal to 1 in each case.

**Table S4:** Crystallographic and Structural refinement parameters for complex **1**.

|                                                      |                                                                                                                                         |
|------------------------------------------------------|-----------------------------------------------------------------------------------------------------------------------------------------|
| Empirical formula                                    | C <sub>34</sub> H <sub>42</sub> Cl <sub>2</sub> Mn <sub>2</sub> N <sub>6</sub> Na <sub>2</sub> O <sub>14</sub>                          |
| CCDC Number                                          | 2260190                                                                                                                                 |
| Formula weight                                       | 985.49                                                                                                                                  |
| Crystal habit, colour                                | Needle-shaped/ colourless                                                                                                               |
| Crystal size, mm <sup>3</sup>                        | 0.35×0.32×0.30                                                                                                                          |
| Temperature, <i>T</i>                                | 293(2)                                                                                                                                  |
| Wavelength, λ(Å)                                     | 0.71073                                                                                                                                 |
| Crystal system                                       | monoclinic                                                                                                                              |
| Space group                                          | 'P 21'                                                                                                                                  |
| Unit cell dimension                                  | <i>a</i> = 9.1405(3) Å, <i>b</i> = 13.8564(5) Å, <i>c</i> = 16.7601(6) Å,<br><i>α</i> = 90.00°, <i>β</i> = 105.4930°, <i>γ</i> = 90.00° |
| Volume, <i>V</i> (Å <sup>3</sup> )                   | 2045.61(12)                                                                                                                             |
| <i>Z</i>                                             | 2                                                                                                                                       |
| Calculated density, mg•mm <sup>-3</sup>              | 1.600                                                                                                                                   |
| Absorption coefficient, <i>μ</i> (mm <sup>-1</sup> ) | 0.843                                                                                                                                   |
| <i>F</i> (000)                                       | 1012                                                                                                                                    |
| <i>θ</i> range for data collection                   | 2.93° to 27.28°                                                                                                                         |
| Limiting indices                                     | -10 ≤ <i>h</i> ≤ 10, -16 ≤ <i>k</i> ≤ 16, -19 ≤ <i>l</i> ≤ 19                                                                           |
| Reflection collected / unique                        | 48385/6849 [ <i>R</i> <sub>(int)</sub> = 0.0257]                                                                                        |
| Completeness to <i>θ</i>                             | 99.0% ( <i>θ</i> = 25°)                                                                                                                 |
| Max. and min. transmission                           | 0.7455/0.6402                                                                                                                           |
| Refinement method                                    | 'SHELXL-2018 (Sheldrick, 2018)'                                                                                                         |
| Data / restraints / parameters                       | 7098/1/578                                                                                                                              |
| Goodness-of-fit on <i>F</i> <sup>2</sup>             | 1.062                                                                                                                                   |
| Final <i>R</i> indices [ <i>i</i> > 2σ( <i>I</i> )]  | <i>R</i> <sub>1</sub> = 0.0211, <i>wR</i> <sub>2</sub> = 0.0552                                                                         |
| <i>R</i> indices (all data)                          | <i>R</i> <sub>1</sub> = 0.0225, <i>wR</i> <sub>2</sub> = 0.0565                                                                         |
| Largest diff. peak and hole                          | 0.202/-0.227                                                                                                                            |

## REFERENCES

- [1] S. V. Eliseeva, B. Song, C. D. B. Vandevyver, A. -S. Chauvin, J. B. Wacker and J. -C. G. Bünzli, *New J. Chem.* **2010**, *34*, 2915-2921.
- [2] C. Moya, R. Escudero, D. C. Malaspina, M. de la Mata, J. Hernández-Saz, J. Faraudo, A. Roig, *ACS Appl. Bio Mater.* **2019**, *2*, 3084-3094.
- [3] E. M. Gale, I. P. Atanasova, F. Blasi, I. Ay, P. Caravan, *J. Am. Chem. Soc.* **2015**, *137*, 15548–15557.
- [4] R. Botár, E. Molnár, Z. Garda, E. Madarasi, G. Trencsényi, J. Kiss, F. K. Kálmán, G. Tircsó, *Inorg. Chem. Front.* **2022**, *9*, 577-583.
